# Supplementary material for: Microplastic contamination in endemic species: a case study on ginger prawn, Metapenaeus kutchensis
Source: Royal Society of Chemistry journal article supplement (doi:10.1039/d5va00047e), 2025-01-01
Supplement: d5va00047e1.pdf [file d5va00047e1.pdf]

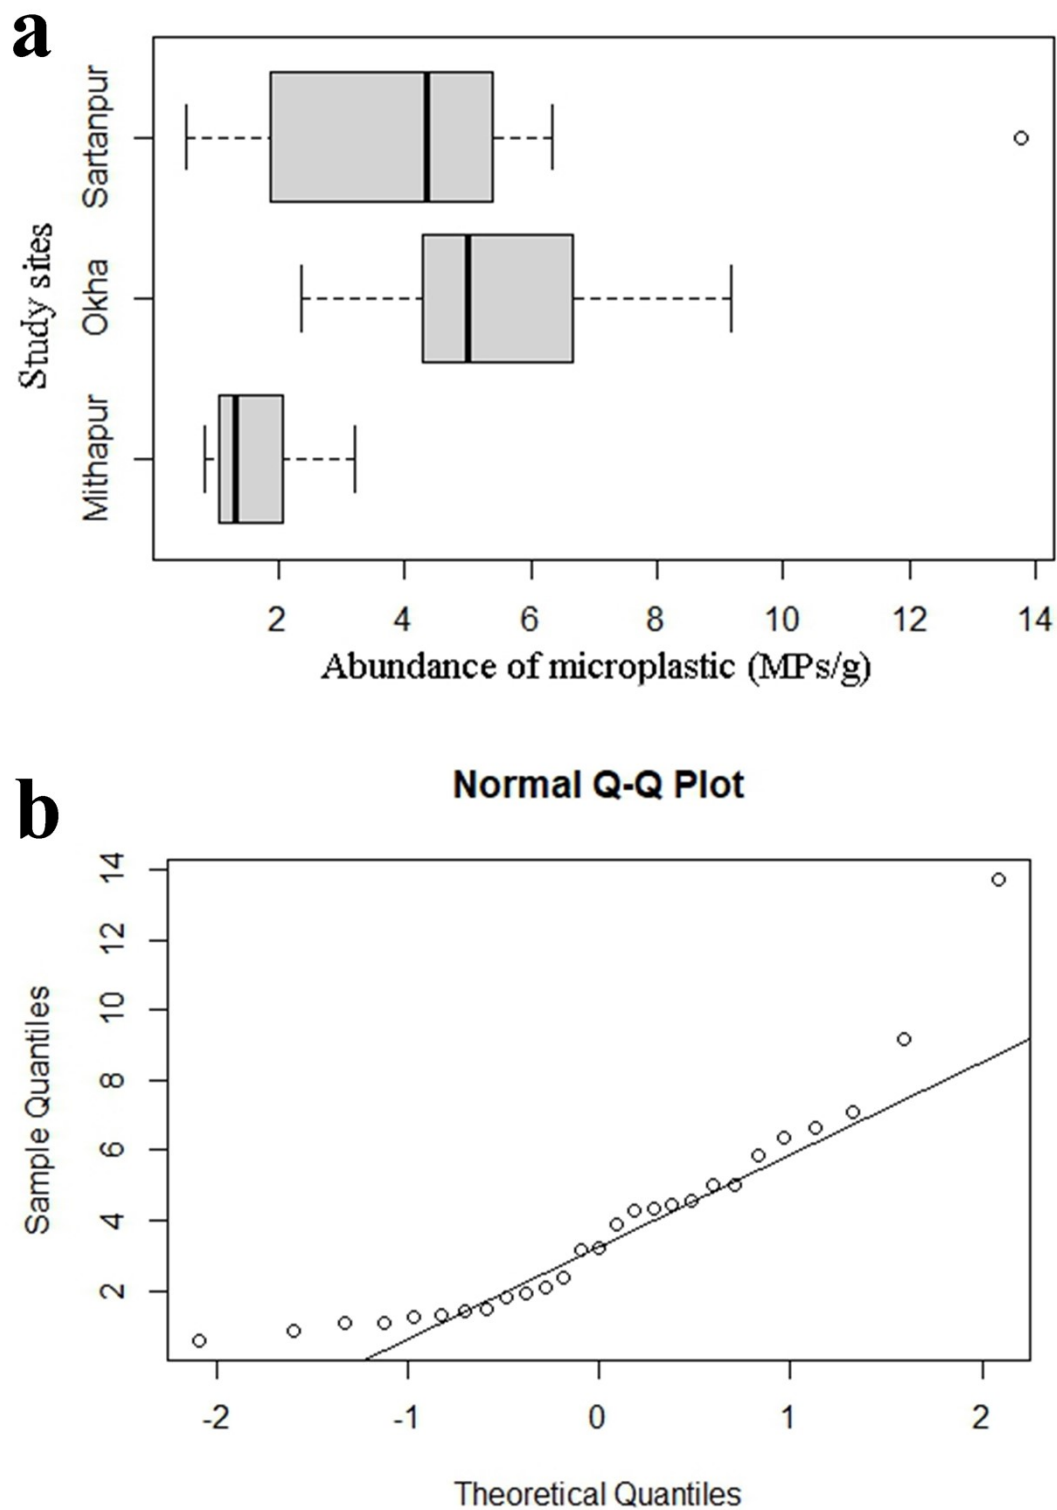

**Fig. 1S:** Abundance of microplastic contamination in the ginger prawn *Metapenaeus kutchensis* collected from three sampling locations of Gujarat coast, India, showing not a normal distribution (Shapiro-Wilk test,  $W = 0.86$ ,  $p < 0.05$ ).
